# Supplementary material
Source: Springer Nature journal article supplement (https://www.springermedizin.de/resource/supplementary/12967_2013_1723_MOESM2_ESM.pdf/9574966)
Supplement: MOESM2 [file 9574966]

**PILOT PHASE**

n=5 patients affected by PSP

PRE-TREATMENT ASSESSMENT:  
Motor, neuropsychological and neuroimaging assessments

BONE MARROW COLLECTION

MESENCHYMAL CELL PRODUCTION

**n=5 patients  
(arteriography + MSC)**

8 weeks FOLLOW-UP ASSESSMENT:  
Cell administration safety + motor, neuropsychological and neuroimaging assessments

12 MONTH FOLLOW-UP ASSESSMENT:  
Safety. Motor, neuropsychological and neuroimaging assessments

18 MONTH FOLLOW-UP ASSESSMENT:  
Safety. Motor, neuropsychological and neuroimaging assessments

**(A)****RANDOMIZED STUDY**

n=20 patients affected by PSP

PRE-TREATMENT ASSESSMENT:  
Motor, neuropsychological and neuroimaging assessments

BONE MARROW COLLECTION

MESENCHYMAL CELL PRODUCTION

**n=10 patients  
1st intervention  
(arteriography + MSC)**

**n=10 patients  
1st intervention  
(sham procedure)**

6 MONTH FOLLOW-UP ASSESSMENT:  
Safety. Motor, neuropsychological and neuroimaging assessments

**n=10 patients  
2nd intervention  
(sham procedure)**

**n=10 patients  
2nd intervention  
(arteriography + MSC)**

12 MONTH FOLLOW-UP ASSESSMENT:  
Safety. Motor, neuropsychological and neuroimaging assessments.

18 MONTH FOLLOW-UP ASSESSMENT:  
Safety. Motor, neuropsychological and neuroimaging assessments

**(B)**
